# Supplementary material
Source: PubMed Central journal article supplement (PMC7954460)

(a)

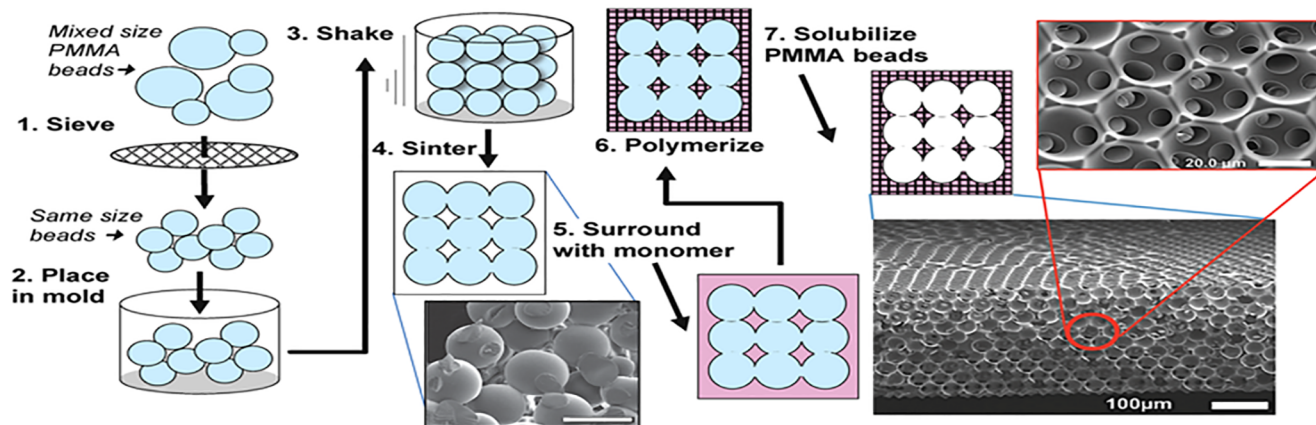

(b)

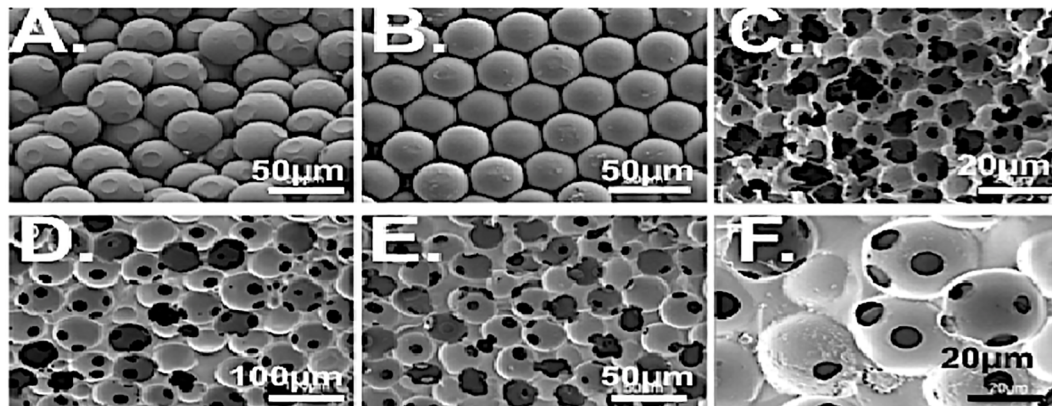

|        | Pore Size (μm) | Throat Size (μm) | Ratio (%)   |
|--------|----------------|------------------|-------------|
| Small  | 18.25 ± 0.36   | 5.45 ± 0.52      | 29.9 ± 2.9  |
| Medium | 38.75 ± 0.75   | 14.97 ± 0.75     | 38.6 ± 1.94 |
| Large  | 92.10 ± 3.21   | 29.66 ± 1.46     | 32.2 ± 1.58 |

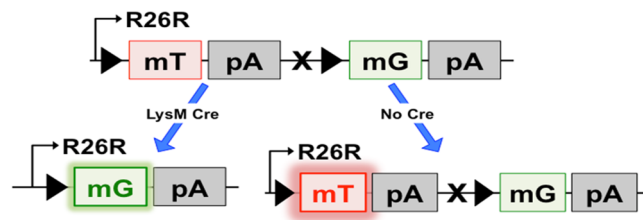

**mTmG Genotyping Primers**

1. 5' CTC TGC TGC CTC CTG GCT TCT 3'  
Homozygous: 250bp product
2. 5' CGA GGC GGA TCA CAA GCA ATA 3'  
Heterozygous = 250, 330bp products
3. 5' TCAATG GGC GGG GGT CGT T 3'  
Wildtype: 330bp product

**LysM-Cre Genotyping Primer Pairs**

1. 5' GAA CCT GAT GGA CAT GTT CAG G 3'  
5' AGT GCG TTC GAA CGC TAG AGC CTG T 3'  
Cre: 350bp product
2. 5' TTA CGT CCA TCG TGG ACA GC 3'  
5' TGG GCT GGG TGT TAG CCT TA 3'  
Myogenin: 250bp product (control)

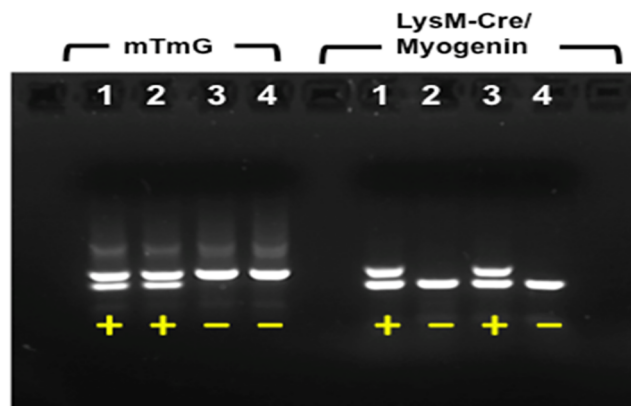

1. Double transgenic
2. mTmG heterozygous
3. LysM-Cre heterozygous
4. Wildtype

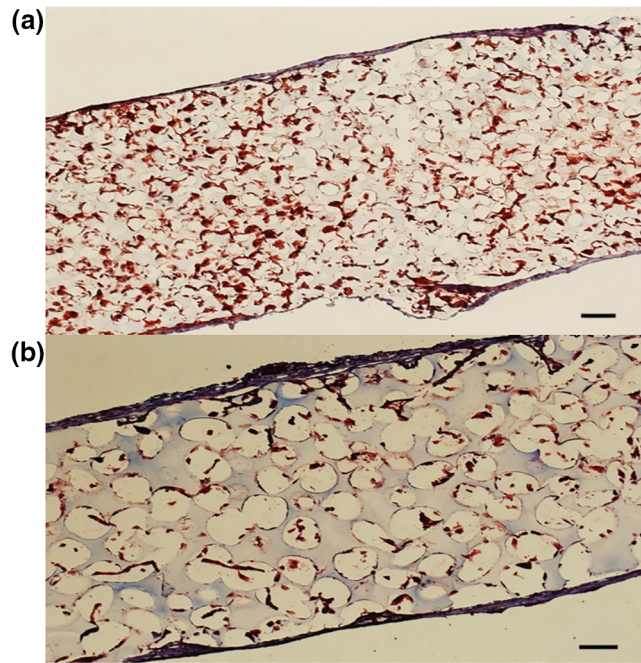

sEV Particle Diameter vs. PTS Pore Size

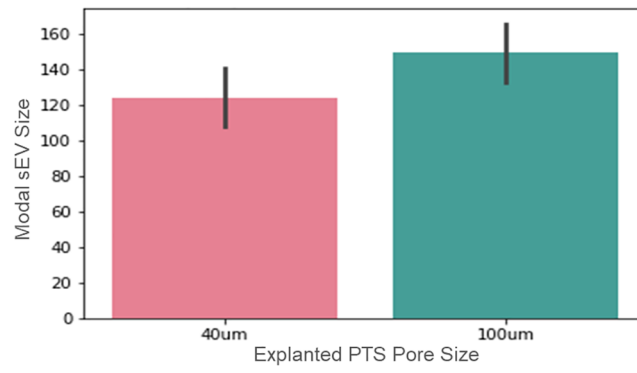

# sEV Distribution in 1wk Explanted Scaffolds

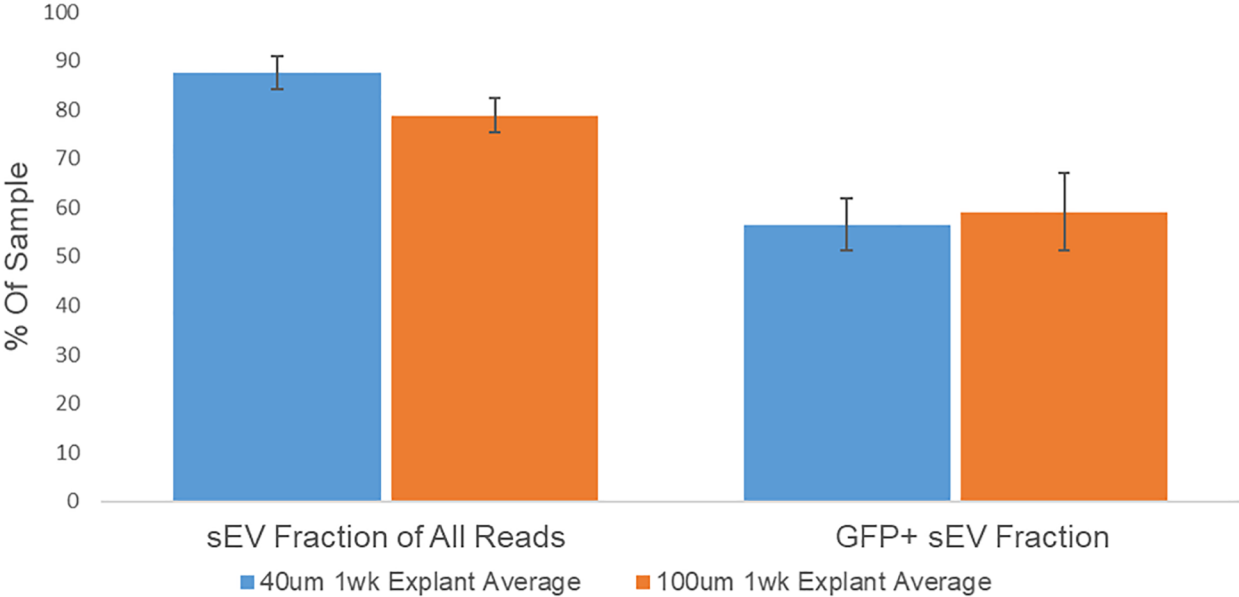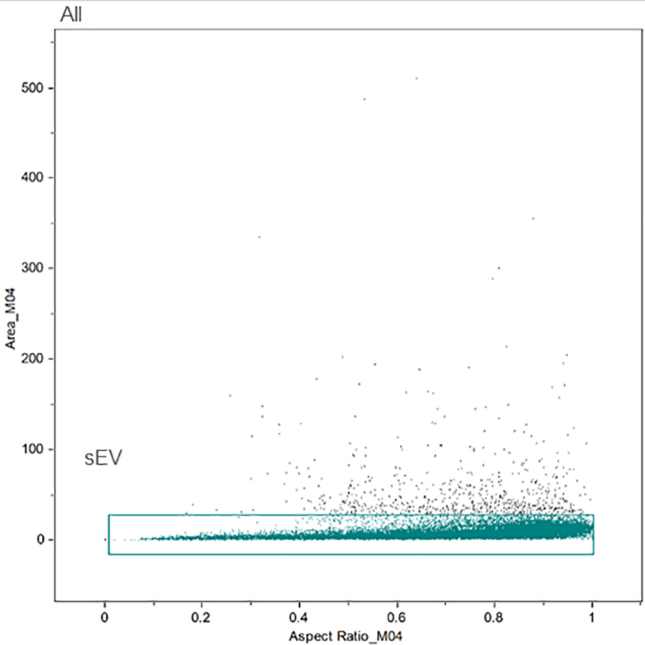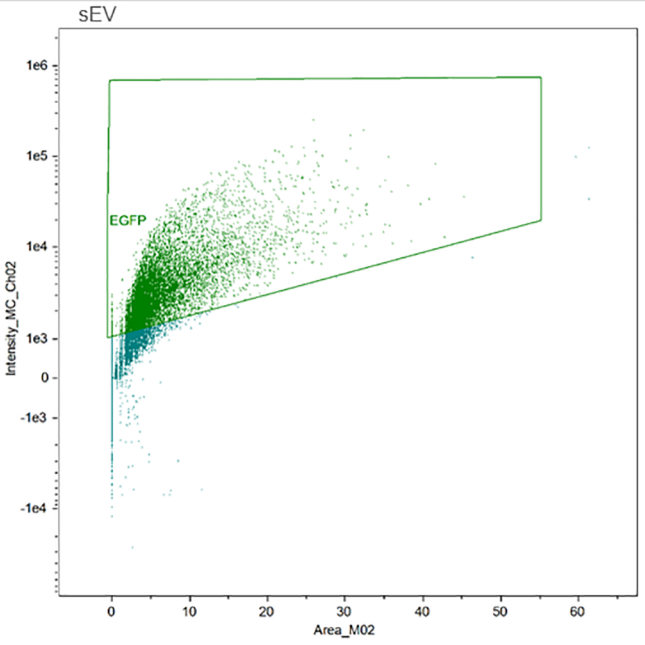

## Summary of Reads Mapping to Annotation Types

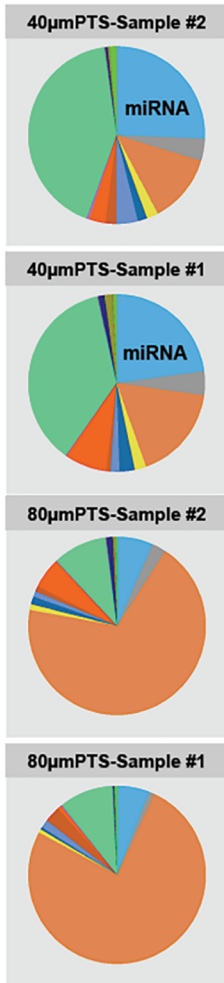

← Myeloid Exosomes

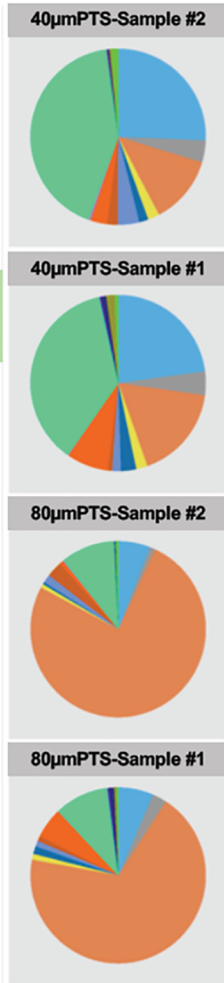

← Non-Myeloid Exosomes

### Gene Type

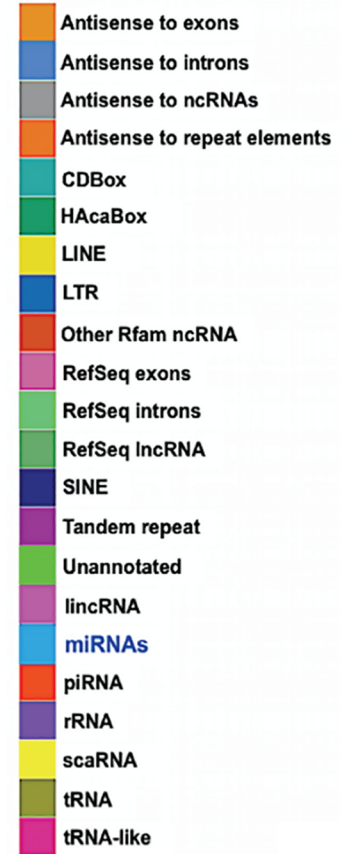

Supplement: NIHMS1666727-supplement-PDF_file_of_Supplement.pdf [file NIHMS1666727-supplement-PDF_file_of_Supplement.pdf]
